# Supplementary material for: Improved efficiency of polymer solar cells by plasmonically enhanced photon recycling
Source: Royal Society of Chemistry journal article supplement (doi:10.1039/c9se00215d), 2019-01-01
Supplement: c9se00215d1.pdf [file c9se00215d1.pdf]

## Supplementary Information

# Improved Efficiency of Polymer Solar Cells by Plasmonically Enhanced Photon Recycling

Seok Ho Cho, Sung-Min Lee,\* and Kyung Cheol Choi\*

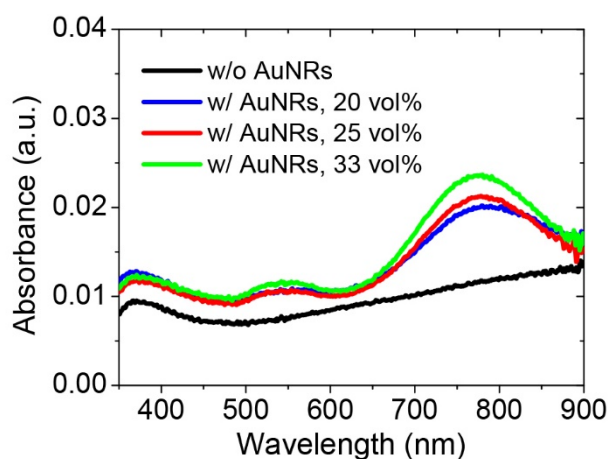

**Fig. S1** Measured absorbance spectra for pristine films of PEDOT:PSS (black line) and AuNR-embedded PEDOT:PSS spin-coated with blended solutions of AuNRs and PEDOT:PSS with 20 (blue line), 25 (red line), and 33 vol% (green line).

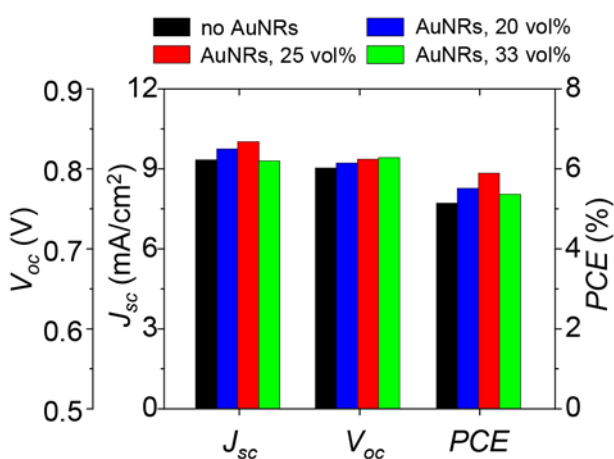

**Fig. S2** Measured photovoltaic parameters of short-circuit current density ( $J_{sc}$ ), open-circuit voltage ( $V_{oc}$ ), and power conversion efficiency ( $PCE$ ) for reference P3HT:ICBA device (black bar) and P3HT:ICBA devices with AuNRs fabricated using blended solutions of AuNRs and PEDOT:PSS with 20 (blue bar), 25 (red bar), and 33 vol% (green bar).

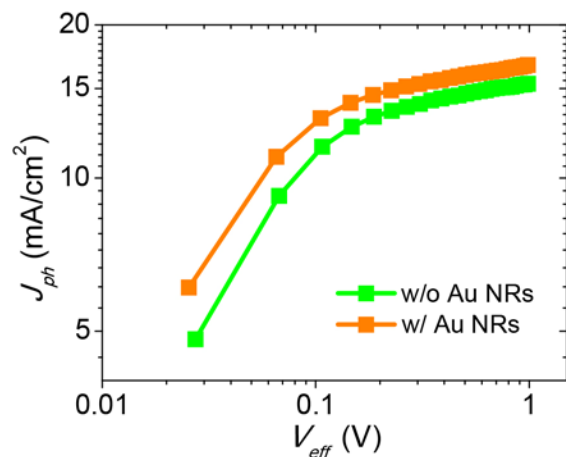

**Fig. S3** Photocurrent density ( $J_{ph}$ )-effective voltage ( $V_{eff}$ ) curves of PTB7-Th:PC<sub>71</sub>BM devices with and without AuNRs.

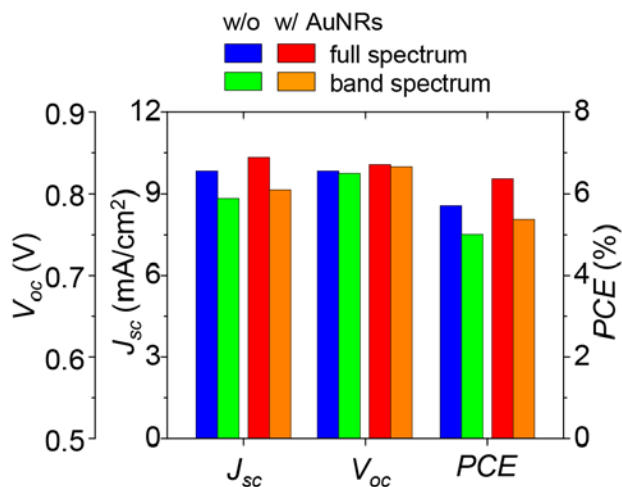

**Fig. S4** Measured photovoltaic parameters of short-circuit current density ( $J_{sc}$ ), open-circuit voltage ( $V_{oc}$ ), and power conversion efficiency ( $PCE$ ) for P3HT:ICBA devices with and without AuNRs under the full AM 1.5G spectrum illumination and the spectrally confined AM 1.5G illumination by a bandpass filter, respectively.
